# Supplementary material
Source: PubMed Central journal article supplement (PMC2915707)
Supplement: supp_M109.062976_jbc.M109.062976-1.pdf [file supp_M109.062976_jbc.M109.062976-1.pdf]

**Supplementary data**

**Identification of small molecules that suppress microRNA pathway and reverse tumorigenesis**

Koichi Watashi, Man Lung Yeung, Matthew F. Starost, Ramachandra S. Hosmane, and Kuan-Teh Jeang

Supplementary Figures S1-8 and legends  
Supplementary Table

Supplementary Fig. S1.

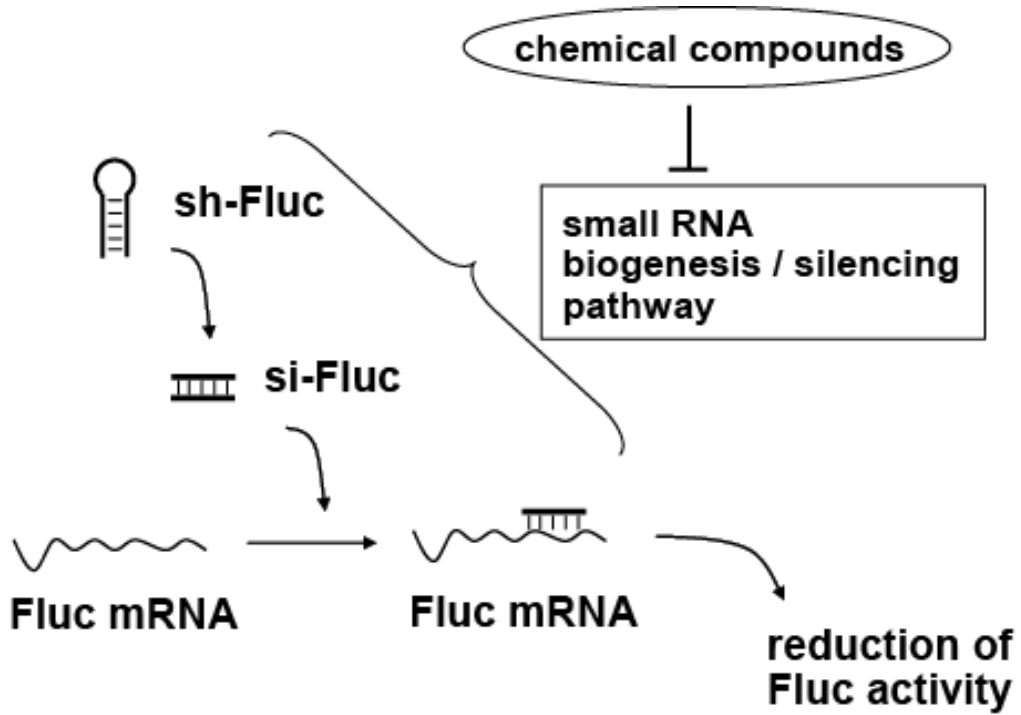

**Supplementary Fig. S1.** Schematic representation of the strategy for identifying compounds that suppress small RNA biosynthesis/silencing pathway.

Supplementary Fig. S2.

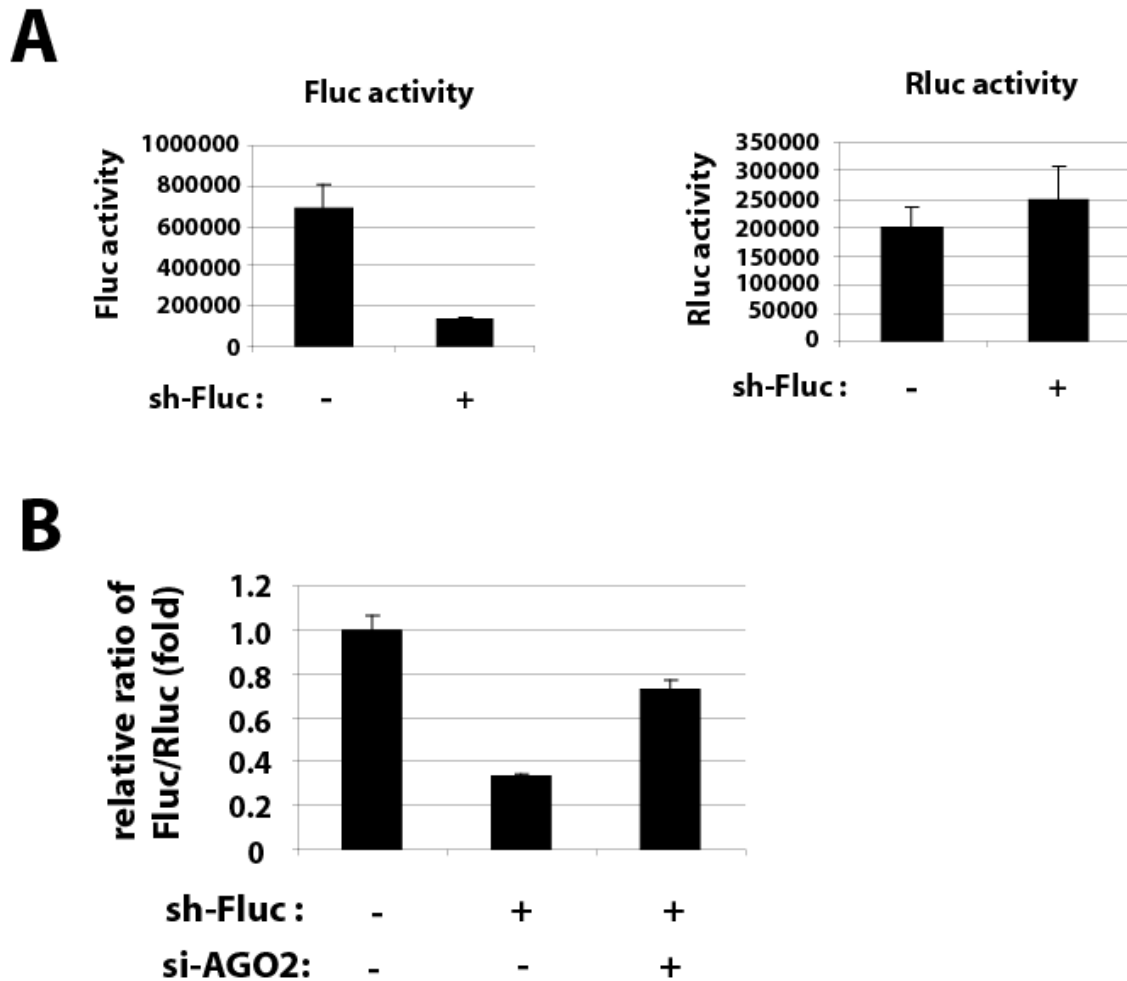

**Supplementary Fig. S2.** Specificity of sh-Fluc suppression of Fluc activity. (A) sh-Fluc (shRNA targeting firefly luciferase mRNA) suppressed the activity of Fluc (firefly luciferase) but not Rluc (renilla luciferase). 293T cells transfected with pGL3 (Fluc plasmid), pRL-TK (Rluc plasmid), and pRS-shLuc (sh-Fluc +) or pRS control vector (sh-Fluc -) were measured for Fluc (left) and Rluc activities (right). (B) Knockdown of endogenous AGO2 reversed shRNA-mediated gene silencing. 293T cells were transfected without (si-AGO2 -) or with (si-AGO2 +) siRNA targeting AGO2. After 24 hrs, the cells were transfected with pGL3 (Fluc), pRL-TK (Rluc), and pRS-shLuc (sh-Fluc +) or pRS control vector (sh-Fluc -). After a further 24 hrs, cells were harvested and detected for Fluc and Rluc activities. Relative ratios of Fluc/Rluc are shown.

Supplementary Fig. S3.

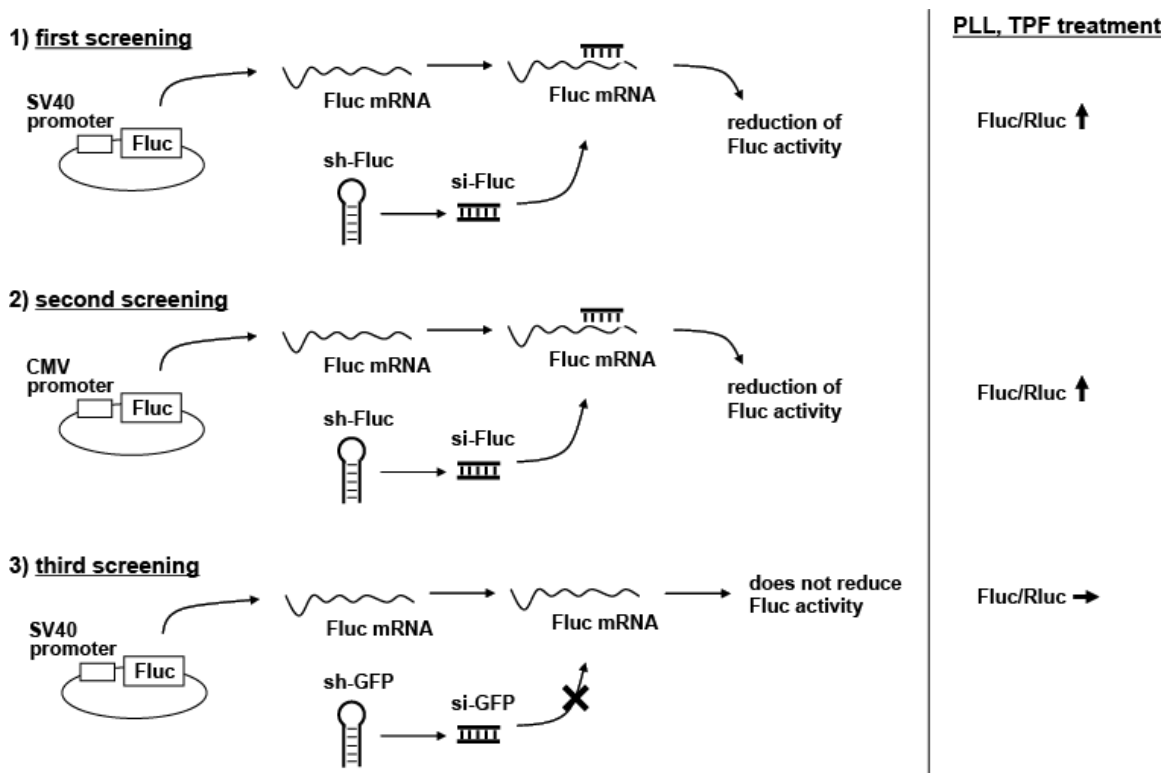

**Supplementary Fig. S3.** The various screening steps and their outcomes. 1) In the first screening, 293T cells were transfected with SV40 promoter-driven Fluc, Rluc, and sh-Fluc, and then treated with individual compounds from the library. 2) The second screening employed a Fluc cDNA driven from a CMV promoter instead of the SV40 promoter. This screening is designed to identify compounds that affect Fluc activity irrespective of the promoter that drives Fluc expression. 3) In the third screening, sh-GFP, which recognizes GFP mRNA, but not Fluc mRNA was used as a negative-control shRNA to rule out non-specific shRNA effects that might affect Fluc activity. In this figure, Rluc is not shown to simplify the schematic presentation. Treatment of transfected cells with PLL and TPF increased the Fluc/Rluc ratio in the first and second screening procedures, but not in the third screening (right).

**Supplementary Fig. S4.**

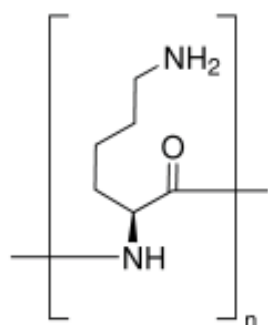

**PLL**

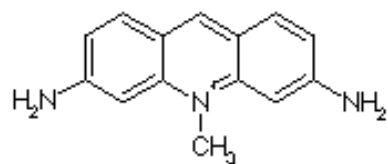

**TPF**

**Supplementary Fig. S4.** The structures of PLL (poly-L-lysine) and TPF (tryptaflavine), two moieties identified from our screening of 530 compounds

Supplementary Fig. S5.

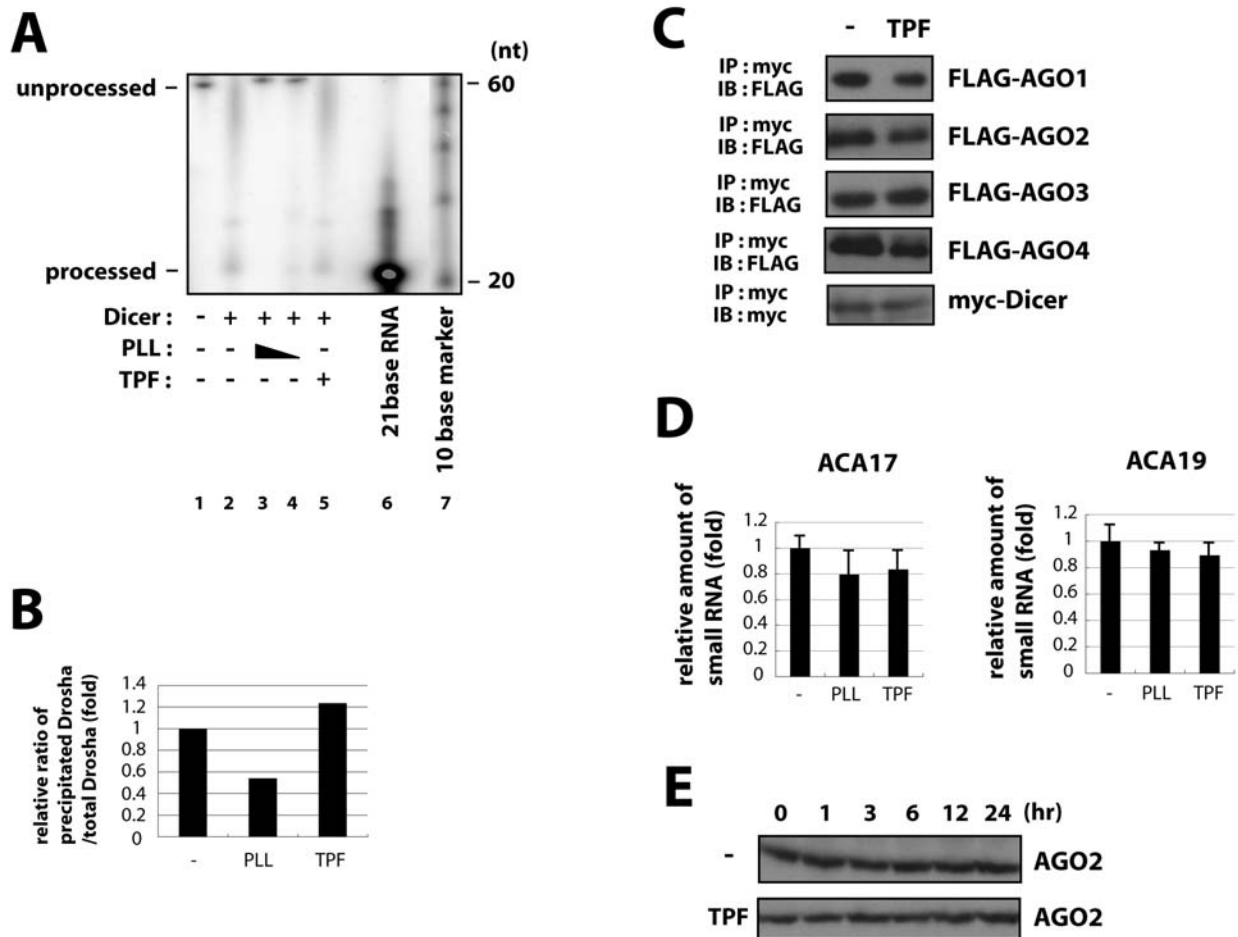

**Supplementary Fig. S5.** Assays for PLL and TPF activities in cell lysates and cultured cells. (A) *In vitro* Dicer assay. Pre-let-7a RNA was labeled with  $^{32}\text{P}$  and incubated with (lanes 2-5) or without (lane 1) Dicer in the presence of PLL (8 and 4  $\mu\text{M}$ ; lanes 3 and 4) or TPF (100  $\mu\text{M}$ ; lane 5). (B) *In vitro* RNA precipitation assays employing biotinylated pre-let-7a RNA in 293T cells over expressing myc-Drosha were performed as in Fig. 2D. The amount of Drosha protein associated with biotinylated RNA was quantified from untreated(-), PLL, or TPF- treated cells. (C) 293T cells overexpressing myc-Dicer were individually transfected with FLAG-AGO1, 2, 3, or 4, and the cells were treated with TPF or untreated (-). Each of the individually transfected cells was immunoprecipitated with anti-myc antibody followed by immunoblot detection with anti-FLAG or anti-myc antibody. The bottom myc-Dicer immunoblot panel is a representative result reflective of the anti-myc IP followed by anti-myc IB seen with each of the FLAG-AGO1, 2, 3, 4 transfected cells. (D) snoRNAs, ACA17 and ACA19 were quantified by real time RT-PCR analysis in 293T cells treated with PLL, TPF, or untreated. (E) The stability of endogenous AGO2 in TPF-treated or untreated (-) 293T cells was detected by immunoblotting with anti-AGO2 after cycloheximide treatment for 1, 3, 6, 12, and 24 hrs.

Supplementary Fig. S6.

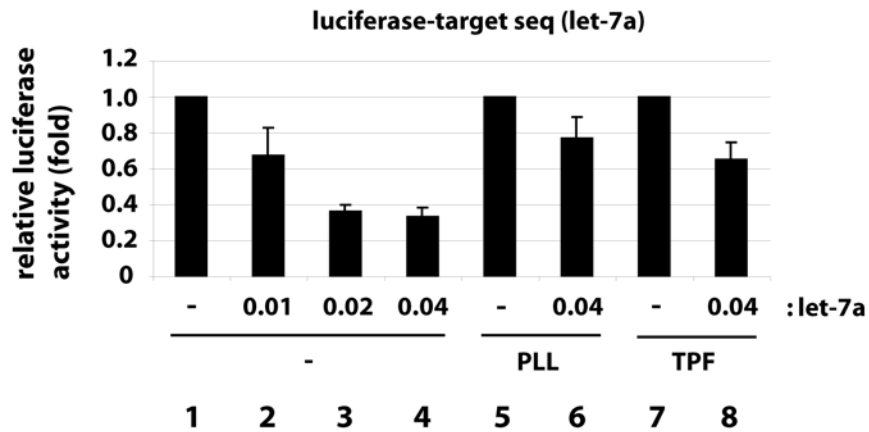

**Supplementary Fig. S6.** PLL and TPF reversed the silencing activity of let-7a. A plasmid encoding firefly luciferase (Fluc) mRNA carrying three repeats of the target sequence for let-7a positioned in its downstream untranslated sequences was transfected into HeLa cells together with an expression plasmid for renilla luciferase (Rluc) and the indicated amounts ( $\mu\text{g}$ ) of let-7a expression plasmid. After 4 hours, cells were treated with PLL or TPF. After another 48 hours, cells were lysed and luciferase activities were quantified. The relative activities of Fluc/Rluc are shown after setting the value in lane 1 as 1.

Supplementary Fig. S7.

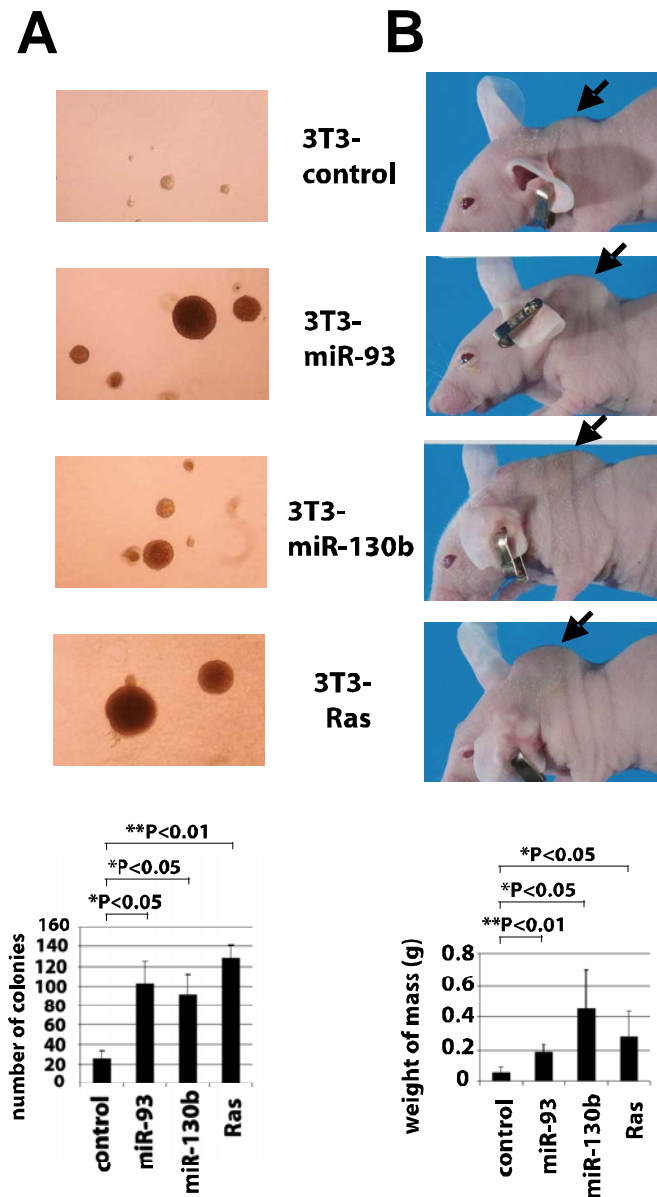

**Supplementary Fig. S7.** A cell-mouse model for miR-93 and -130b-dependant tumorigenesis. (A) NIH3T3 cells stably over expressing miR-93 (3T3-miR-93), -130b (3T3-miR-130b), or Ras (3T3-Ras), or control (3T3-control) cells with an empty vector (3T3-control) were assayed for focus formation in soft agar. Microscopy (upper) and graphic tabulation of colonies (bottom) are shown. 3T3-miR-93 and 3T3-miR-130b as well as 3T3-Ras produced significantly higher numbers of colonies than control. (B) 3T3-control, 3T3-miR-93, 3T3-miR-130b, and 3T3-Ras cells were implanted into nude mice subcutaneously in the back of the neck and observed for tumor formation. Pictures of the mice (upper) and the average weights of tumor masses dissected from the animals after necropsy (bottom) are shown.



Supplementary Fig. S8.

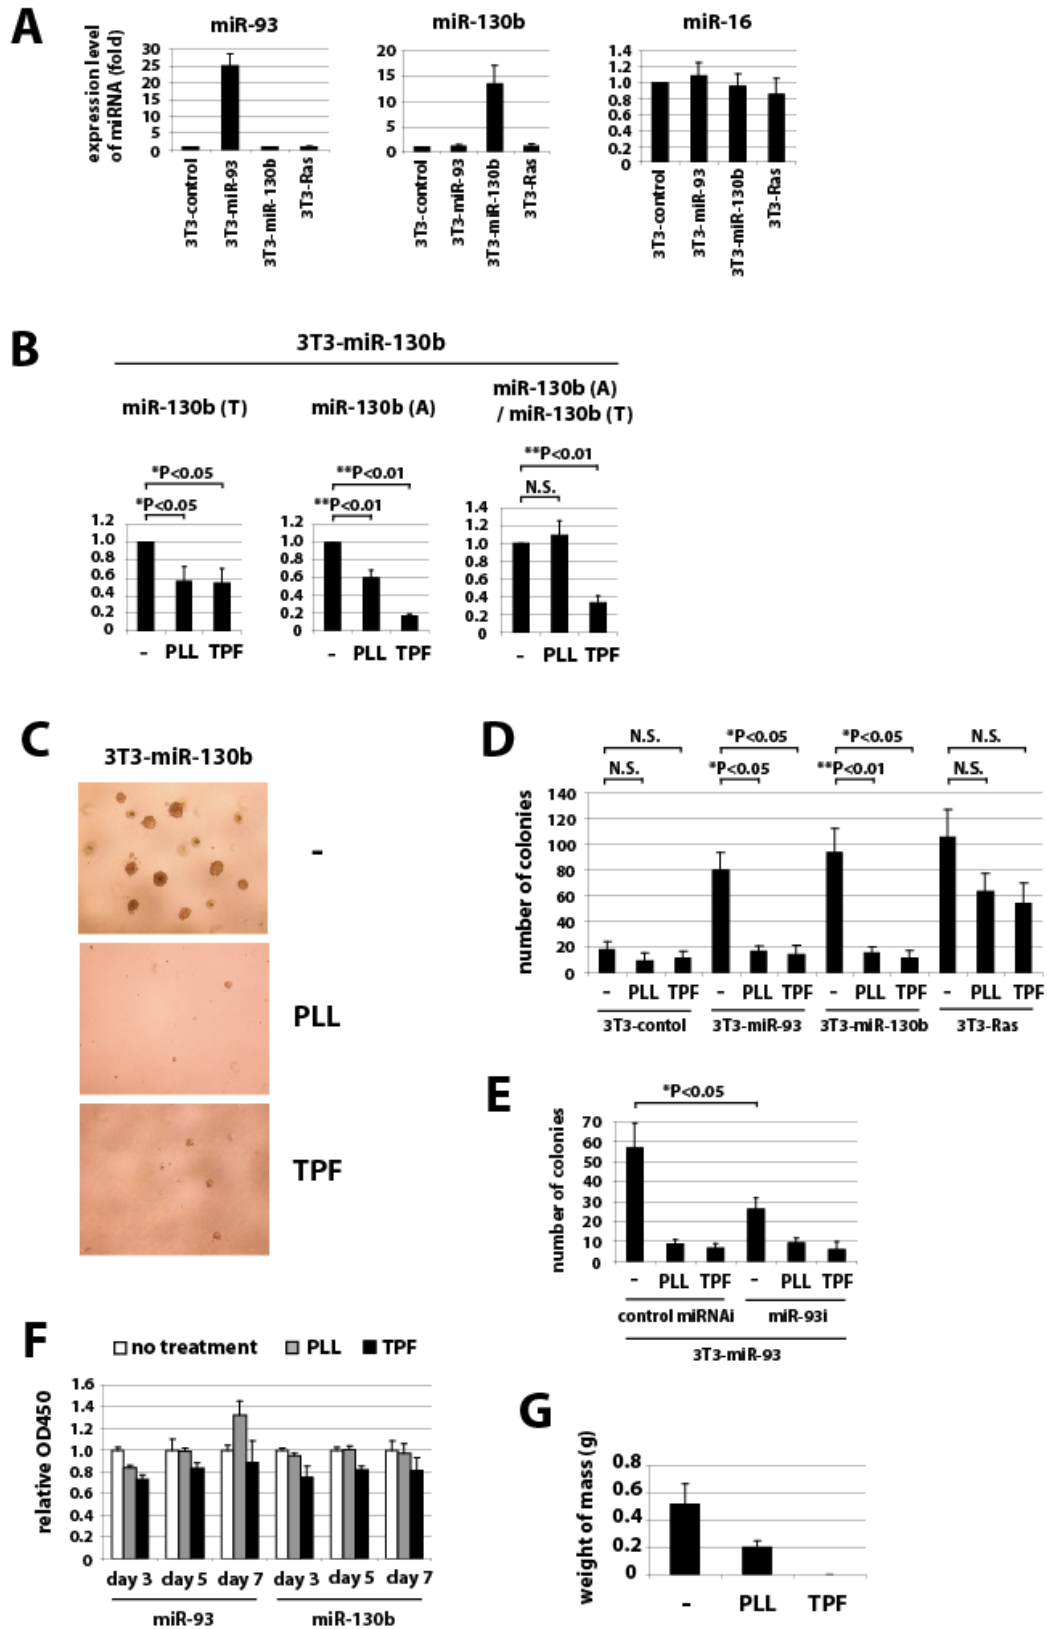

**Supplementary Fig. S8.** PLL and TPF treatment reduced the tumorigenic activity of miR-93 and -130b. (A) miR-93, miR-130b, and miR-16 (as a control) were quantified in 3T3-control, 3T3-miR-93, 3T3-miR-130b, and 3T3-Ras cells by real time RT-PCR analyses. (B) 3T3-miR-130b cells transfected with FLAG-AGO2 were treated with PLL or TPF, or were untreated (-) for 3 days, and then the cells were recovered for small RNAs as described in Fig. 6A. MiR-130b in the miRNA(T) and the miRNA(A) fractions were quantified, and the ratios of miRNA(A)/miRNA(T) are shown. (C) 3T3-miR-130b cells treated with 2  $\mu$ M PLL, 1  $\mu$ M TPF, or untreated (-), were observed in soft agar growth assays as described in Fig. 6B. Representative images are shown. (D) Colony formation assays were performed with 3T3-control, 3T3-miR-93, 3T3-miR-130b, and 3T3-Ras cells treated with PLL, TPF, or untreated, as described in Fig. 6B. Numbers of colonies were counted and shown. (E) 3T3-miR-93 cells transfected with antagonizing oligonucleotide for miR-93 (miR-93i) or a randomized oligonucleotide (control miRNAi) were subjected to colony formation assay as described in Fig. 6B. Numbers of colonies were counted and shown. (F) MTT assays of 3T3-miR-93 and 3T3-miR-130b cells treated with 2  $\mu$ M PLL, 1  $\mu$ M TPF, or untreated at days 3, 5, and 7 post treatment. (G) The average weights of tumor masses for the results in Fig. 6C are shown.

**Supplementary Table.** Names of chemical compounds screened in this study.

|            |                   |                              |                        |
|------------|-------------------|------------------------------|------------------------|
| A23187     | AB-RSH-5          | Baicalein                    | Cisplatin              |
| 17-AAG     | AB-RSH-6          | Bafilomycin A1               | Clofibrate             |
| AB-112     | AB-RSH-7          | BAPTA-AM                     | CPA                    |
| AB-120     | AB-RSH-9          | BBL-1                        | 9cRA                   |
| AB-122     | ABR-1             | BBL-116                      | Cucurbitacin I         |
| AB-124     | ABR-6             | BBL-128                      | Cycloheximide          |
| AB-13      | ABR-8             | BBL-132                      | Cyclosporin A          |
| AB-150     | ABRSH-5           | BBL-135                      | Cytochalasin D         |
| AB-160-OMe | ABRSH-6           | BBL-13                       | Damnacanthal           |
| AB-161     | ABRSH-10H         | BBL-159                      | Daunorubicin           |
| AB-162     | Aclarubicin       | BBL-161                      | Decylubiquinone        |
| AB-166     | acetic acid       | BBL-19                       | Deoxynojirimycin       |
| AB-166B    | Actinomycin D     | BBL-228                      | Dephostatin            |
| AB-171     | Actinonin         | BBL-32                       | Deprenyl               |
| AB-173     | ADP               | BBL-37                       | Dequalinium            |
| AB-174     | AG1024            | BBL-37-1R                    | Dexamethasone          |
| AB-175     | AG1296            | BBL-38-18R                   | DFMO                   |
| AB-176     | AG1478            | BBL-43                       | Diazoxide              |
| AB-18      | AG490             | BBL-44                       | 2',5'-dideoxyadenosine |
| AB-180     | AG825             | BBL-5                        | DIDS                   |
| AB-185     | AG957             | BBL-59                       | Diltiazem              |
| AB-186     | ALLN              | BBL-65                       | DMSO                   |
| AB-2       | a-Amanitin        | BBL-66                       | Doxorubicin            |
| AB-200     | Amastatin         | BBL-67                       | E-64d                  |
| AB-203     | AMD3100           | BBL-78                       | EGF                    |
| AB-213     | Amiloride         | BBL-RSH-1                    | ethanol                |
| AB-214     | 1-aminoanthracene | BBL-RSH-2                    | Etoposide              |
| AB-221     | 2-aminoanthracene | Benzamide                    | ETYA                   |
| AB-222     | Aminoglutethimide | Benzylguanine                | Finasteride            |
| AB-260     | Aminoguanidine    | Bestatin                     | FK-506                 |
| AB-3       | AMT               | bFGF                         | Flutamide              |
| AB-31      | Anacardic acid    | Bisindolymaleimide I         | fluvastatin            |
| AB-32      | Antimycin A1      | Bisphenol A diglycidyl ether | Formestane             |
| AB-43      | Aphidicolin       | BKA                          | FTI-276                |
| AB-49      | AR-1              | blastidicin                  | 5-FU                   |
| AB-5       | AR-104            | Bleomycin                    | Fumagillin             |
| AB-53      | AR-122            | BMP4                         | Fumitremorgin C        |
| AB-55      | AR-19             | t-Butylhydroquinone          | Fumonisin B1           |
| AB-57      | AR-2              | C75                          | geneticin              |
| AB-61      | AR-20             | CA-074                       | Genistein              |
| AB-63      | AR-3              | calpeptin                    | gentamicin             |
| AB-64      | AR-4              | Camptothecin                 | GGTI-286               |
| AB-66      | AR-5              | Cantharidin                  | Glibenclamide          |
| AB-67      | AR-6              | CAT                          | GM 6001                |
| AB-68      | AR-61             | CB-10                        | Go6976                 |
| AB-82      | AR-RSH-1          | CB-129                       | H-7                    |
| AB-85      | arachidonic acid  | CB-45                        | H-89, HCl              |
| AB-87A     | arsenate          | 2CB-202                      | HA 14-1                |
| AB-9       | arsenite          | 3-CB-85                      | HMC-RSH-12             |
| AB-RSH-1   | 3-ATA             | 6-CB-59                      | HMC-RSH-16             |
| AB-RSH-11  | ATRA              | 6-CB-79                      | HMC-RSH-2              |
| AB-RSH-2   | Azacytidine       | 7-CB-178                     | HMC-RSH-26             |
| AB-RSH-4   | AZT               | Cerulein                     | HMC-RSH-27             |

## Supplementary Table (continued).

|                  |                           |                          |               |
|------------------|---------------------------|--------------------------|---------------|
| HMC-RSH-29       | L-NMMA                    | Phenelzine               | SP-131        |
| HMC-RSH-3        | Lonidamine                | N-phenylanthranilic acid | SP-133        |
| HMC-RSH-30       | Lovastatin                | Pifithrin-a (cyclic)     | SP-136        |
| HMC-RSH-31       | LY294002                  | PMA                      | SP-137        |
| HMC-RSH-32       | LY 83583                  | polyarginine             | SP-138        |
| HMC-RSH-33       | Manumycin A               | polylysine               | SP-139        |
| HMC-RSH-36       | Methotrexate              | PRIMA-1                  | SP-141        |
| HMC-RSH-37       | methylene blue            | proflavin                | SP-144        |
| HMC-RSH-41       | MG-132                    | puromycin                | SP-146        |
| HMC-RSH-42       | Mifepristone              | Purvalanol A             | SP-159        |
| HMC-RSH-44       | Mitomycin C               | quinacrine               | SP-196        |
| HMC-RSH-45       | MK 886                    | R59022                   | SP-197        |
| HMC-RSH-5        | ML-7                      | Radicalcol               | SP-199*       |
| HMC-RSH-51       | Monastrol                 | Rapamycin                | SP-212        |
| HMC-RSH-53       | Monensin                  | RHC80267                 | SP-217        |
| HMC-RSH-57       | MPA                       | riboflavin               | SP-225        |
| HMC-RSH-58       | MST-312                   | RK-05                    | SP-227        |
| HMC-RSH-61       | N-Acetyl-L-cysteine       | RK-06                    | SP-3*         |
| HMC-RSH-62       | Nalidixic acid            | RK-07                    | SP-35         |
| HMC-RSH-66       | NB-DNJ                    | RK-33                    | SP-36*        |
| HMC-RSH-67       | NEM                       | RK-40                    | SP-39*        |
| HMC-RSH-71       | Nifedipine                | RK-48                    | SP-43         |
| HMC-RSH-72       | Nigericin                 | RK-52                    | SP-45         |
| HMC-RSH-75       | Nocodazole                | RKP-04                   | SP-47         |
| HMC-RSH-76       | Nordihydroguaiaretic acid | RKP-08                   | SP-48         |
| HMC-RSH-77       | NS-398                    | RKP-09                   | SP-51         |
| HMC-RSH-78       | NS-1                      | RKP-09a                  | SP-6          |
| HMC-RSH-79       | NS-1'                     | Ro-20-1724               | SP600125      |
| HMC-RSH-8        | NS-2                      | Ro 5-4864                | Staurosporine |
| HMC-RSH-9        | NS-3                      | Rotenone                 | SU1498        |
| 4-OH tamoxifen   | NS-3'                     | Rp-8-CPT-cGMPS           | Sulindac      |
| Hydroxyurea      | NS-4                      | RSH-004                  | Swainsonine   |
| hygromycin B     | NS-6                      | RSH-005                  | Tamoxifen     |
| IBMX             | Nutlin-3                  | RSH-009                  | TBB           |
| IFNa             | NZ28                      | RSH-012                  | TFP           |
| IFNb             | NZ48                      | RSH-019                  | TGF-b2        |
| IFNg             | NZ49                      | RSH-020                  | Thapsigargin  |
| IGF1             | NZ50                      | RSH-027                  | Theophylline  |
| IL-1b            | NZ51                      | RSH-117                  | thymidine     |
| IL-6             | NZ-53                     | RSH-161A                 | TNFa          |
| insulin          | ODQ                       | RSH-6101                 | To-901317     |
| Ionomycin        | Oligomycin                | salicylate               | TOFA          |
| IPTG             | Olomoucine                | Sanguinarine             | TR-079        |
| juglone          | Ouabain                   | SB 203580                | TR-175        |
| kanamycin        | Paclitaxel                | SB 431542                | TR-191        |
| Kenpaullone      | PAO                       | SC560                    | TR-196        |
| KN93             | PD169316                  | SP-102*                  | TR-197        |
| KT 5823          | PD 98059                  | SP-116                   | TR-251        |
| Lactacystin      | PDGF-AA                   | SP-119                   | TR-253        |
| Leptomycin B     | PDGF-BB                   | SP-120                   | TR-255        |
| LFM-A13          | Pepstatin A               | SP-121                   | TR-264        |
| Lidocaine        | PGA1                      | SP-122                   | TR-267        |
| lithium chloride | PHA                       | SP-128                   | TR-268        |

**Supplementary Table (continued).**

|                    |             |
|--------------------|-------------|
| TR-269             | VK-5        |
| TR-270             | VK-5dimer   |
| TR-272             | VK-5NH2     |
| TR-275             | VK-50       |
| TR-280             | VK-52       |
| TR-281             | VK-53       |
| TR-291             | VK-54       |
| TR-601             | VK-6        |
| TR-609             | VK-6A       |
| TR-610             | VK-6B       |
| TR-90              | VK-6C       |
| TR-91              | VK-6X       |
| TR-94              | VK-7        |
| TR-96              | VK-7C       |
| Trichostatin A     | VK-75       |
| Troglitazone       | VK-8        |
| trypafravine       | VK-RSH-1    |
| Tunicamycin        | VK-RSH-10   |
| U0126              | VK-RSH-12   |
| UMR-101a           | VK-RSH-16   |
| UMR-101b           | VK-RSH-18   |
| UMR-103            | VK-RSH-2    |
| UMR-104a           | VK-RSH-20   |
| UMR-104b           | VK-RSH-22   |
| UMR-118            | VK-RSH-3    |
| UMR-120            | VK-RSH-6    |
| UMR-121            | VK-RSH-7    |
| UMR-126            | 1400W, HCl  |
| UMR-127            | Wortmannin  |
| UMR-164            | Xanthohumol |
| UMR-20             | Zaprinast   |
| UMR-22             | ZP-110      |
| UMR-38             | ZP-121      |
| UMR-63             | ZP-122      |
| Valeryl salicylate | ZP-147      |
| Valinomycin        | Z-VAD-FMK   |
| Verapamil          |             |
| Vinblastine        |             |
| VK-1               |             |
| VK-100             |             |
| VK-102             |             |
| VK-103             |             |
| VK-106             |             |
| VK-120             |             |
| VK-2               |             |
| VK-24              |             |
| VK-25              |             |
| VK-26              |             |
| VK-27              |             |
| VK-3               |             |
| VK-32              |             |
| VK-4               |             |
| VK-4-OPFP          |             |
